# Supplementary material for: 3D-QSAR studies on the structure–bitterness analysis of citrus flavonoids
Source: Royal Society of Chemistry journal article supplement (doi:10.1039/d3fo00601h), 2023-01-01
Supplement: d3fo00601h1.pdf [file d3fo00601h1.pdf]

## Supplementary information

### **3D-QSAR studies on structure-bitterness analysis of citrus flavonoids**

Lufang Chen <sup>a, 1</sup>, Yanling Lin <sup>a, 1</sup>, Xing Yan <sup>a</sup>, Hui Ni <sup>a, b, c</sup>, Feng Chen <sup>d</sup>, Fan He <sup>a, b, c, \*</sup>

<sup>a</sup> *College of Ocean Food and Biological Engineering, Jimei University, Xiamen 361021, China*

<sup>b</sup> *Research Center of Food Biotechnology of Xiamen City, Xiamen 361021, China*

<sup>c</sup> *Fujian Provincial Key Laboratory of Food Microbiology and Enzyme Engineering, Xiamen 361021, China*

<sup>d</sup> *Department of Food, Nutrition and Packaging Sciences, Clemson University, Clemson, SC 29634, USA*

*\* Corresponding author.*

*No.43, Yindou Road, QiaoYing District, Xiamen, 361021, China.*

*E-mail: fanhefood@jmu.edu.cn*

<sup>1</sup> Lufang Chen and Yanling Lin contributed equally to this work.

This material includes: The correlation between the training set and test set observed

value data and predicted value data (Figure S1) and bitterness threshold of 20 flavonoids (Table S1).

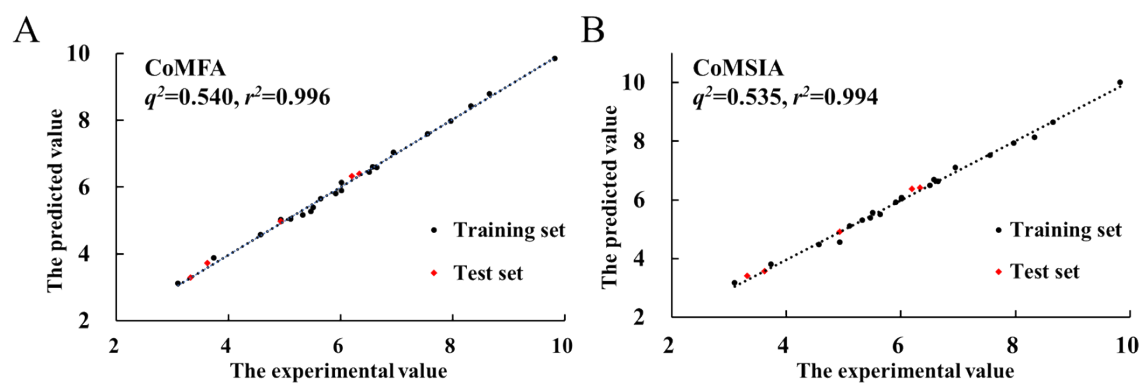

**Figure S1.** The correlation between the training set and test set observed value data and predicted value data. (A): CoMFA model results; (B): CoMSIA model results

**Table S1** Bitterness threshold of 26 flavonoids

|           | Compound Structure                                                                                    | Bitterness Threshold | Compound Structure                                                                                                   | Bitterness Threshold | Compound Structure                                                                                          | Bitterness Threshold | Compound Structure                                                                                    | Bitterness Threshold | Compound Structure                                                                                      | Bitterness Threshold |
|-----------|-------------------------------------------------------------------------------------------------------|----------------------|----------------------------------------------------------------------------------------------------------------------|----------------------|-------------------------------------------------------------------------------------------------------------|----------------------|-------------------------------------------------------------------------------------------------------|----------------------|---------------------------------------------------------------------------------------------------------|----------------------|
| Flavanone | 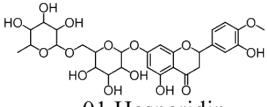<br>01 Hesperidin    | 0.075                | <br>02 Hesperetin                   | 0.011                | <br>09 Narirutin          | 0.042                | <br>10 Naringin    | 0.015                | <br>12 Neohesperidin | 0.025                |
|           | <br>13 Neohesperidin | 0.002                | <br>21 Hesperetin-7-O-glucoside     | 0.010                | <br>22 Eriocitrin         | 0.012                | <br>23 Naringenin  | 0.033                |                                                                                                         |                      |
|           | <br>03 Diosmin       | 0.023                | <br>04 Orientin                     | 0.003                | <br>06 Linarin            | 0.005                | <br>07 Vitexin     | 0.001                |                                                                                                         |                      |
|           |                                                                                                       |                      |                                                                                                                      |                      |                                                                                                             |                      |                                                                                                       |                      |                                                                                                         |                      |
| Flavone   | <br>08 Luteoloside   | 0.017                | <br>11 Rhoifolin                    | 0.029                | <br>15 Neodiosmin         | 0.022                | <br>17 Isoorientin | 0.016                |                                                                                                         |                      |
|           |                                                                                                       |                      |                                                                                                                      |                      |                                                                                                             |                      |                                                                                                       |                      |                                                                                                         |                      |
| Flavonol  | <br>05 Rutin        | 0.117                | <br>14 Isorhamnetin-3-O-rutinoside | 0.033                | <br>18 Isoquercitrin     | 0.011                |                                                                                                       |                      |                                                                                                         |                      |
|           | <br>19 Hyperoside  | 0.004                | <br>24 Astragalin                 | 0.014                | <br>26 Dihydromyricetin | 0.081                |                                                                                                       |                      |                                                                                                         |                      |
| PMF       | <br>16 Nobiletin   | 0.008                | <br>20 5-Demethylnobiletin        | 0.020                | <br>25 Tangeretin       | 0.100                |                                                                                                       |                      |                                                                                                         |                      |
